# Supplementary material
Source: MDPI journal article supplement (https://www.mdpi.com/2072-4292/15/19/4842)
Supplement: s1 [file s1]

## *Supplementary Material*

# **Assessing the recent trends of land degradation and desertification in Romania using remote sensing indicators.**

**Irina Ontel<sup>1\*</sup>, Sorin Cheval<sup>2,3,4</sup>, Anisoara Irimescu<sup>1</sup>, George Boldeanu<sup>5</sup>, Vlad-Alexandru Amihaesei<sup>3,6</sup>, Denis Mihailescu<sup>1</sup>, Argentina Nertan<sup>1</sup>, Claudiu-Valeriu Angearu<sup>1</sup>, Vasile Craciunescu<sup>1</sup>**

<sup>1</sup>Remote Sensing and Satellite Meteorology Laboratory, National Meteorological Administration, 97 Sos. București-Ploiești, 013686 Bucharest, Romania

<sup>2</sup> National Institute for Research and Development in Forestry “Marin Dracea”, Bucharest, Romania

<sup>3</sup> Department of Climatology, National Meteorological Administration, 97 Sos. București-Ploiești, 01686, Bucharest, Romania

<sup>4</sup> Doctoral School of Geography, Faculty of Geography, Babeș-Bolyai University, 5-7 Clinicilor Street, Cluj-Napoca, Romania

<sup>5</sup> Doctoral School “Simion Mehedinți”, Faculty of Geography, University of Bucharest, Blvd. Nicolae Bălcescu, no.1, Bucharest, Romania

<sup>6</sup> Department of Geography, Faculty of Geography and Geology, Alexandru Ioan Cuza University of Iași, 20A Carol I Blvd., 700 505 Iasi, Romania

\* Correspondence: Irina Ontel, e-mail: [irina.ontel@meteoromania.ro](mailto:irina.ontel@meteoromania.ro)

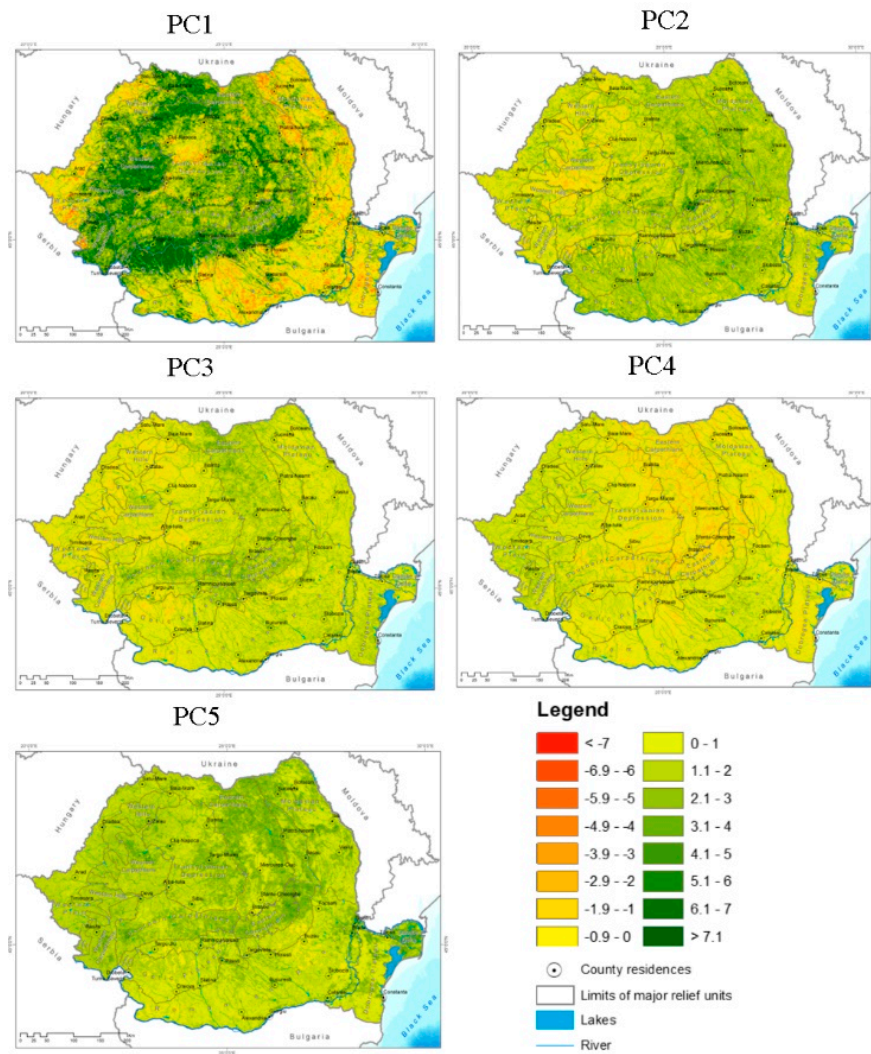

Figure S1: The spatial distribution of the values of the principal components.

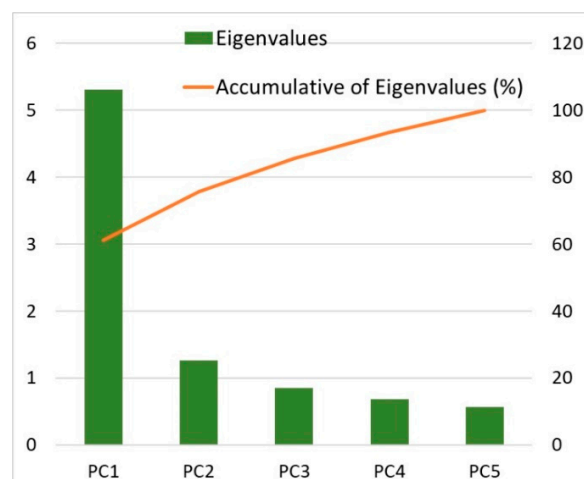

Figure S2: The percentage of the accumulation of eigenvalues captured by the principal components.

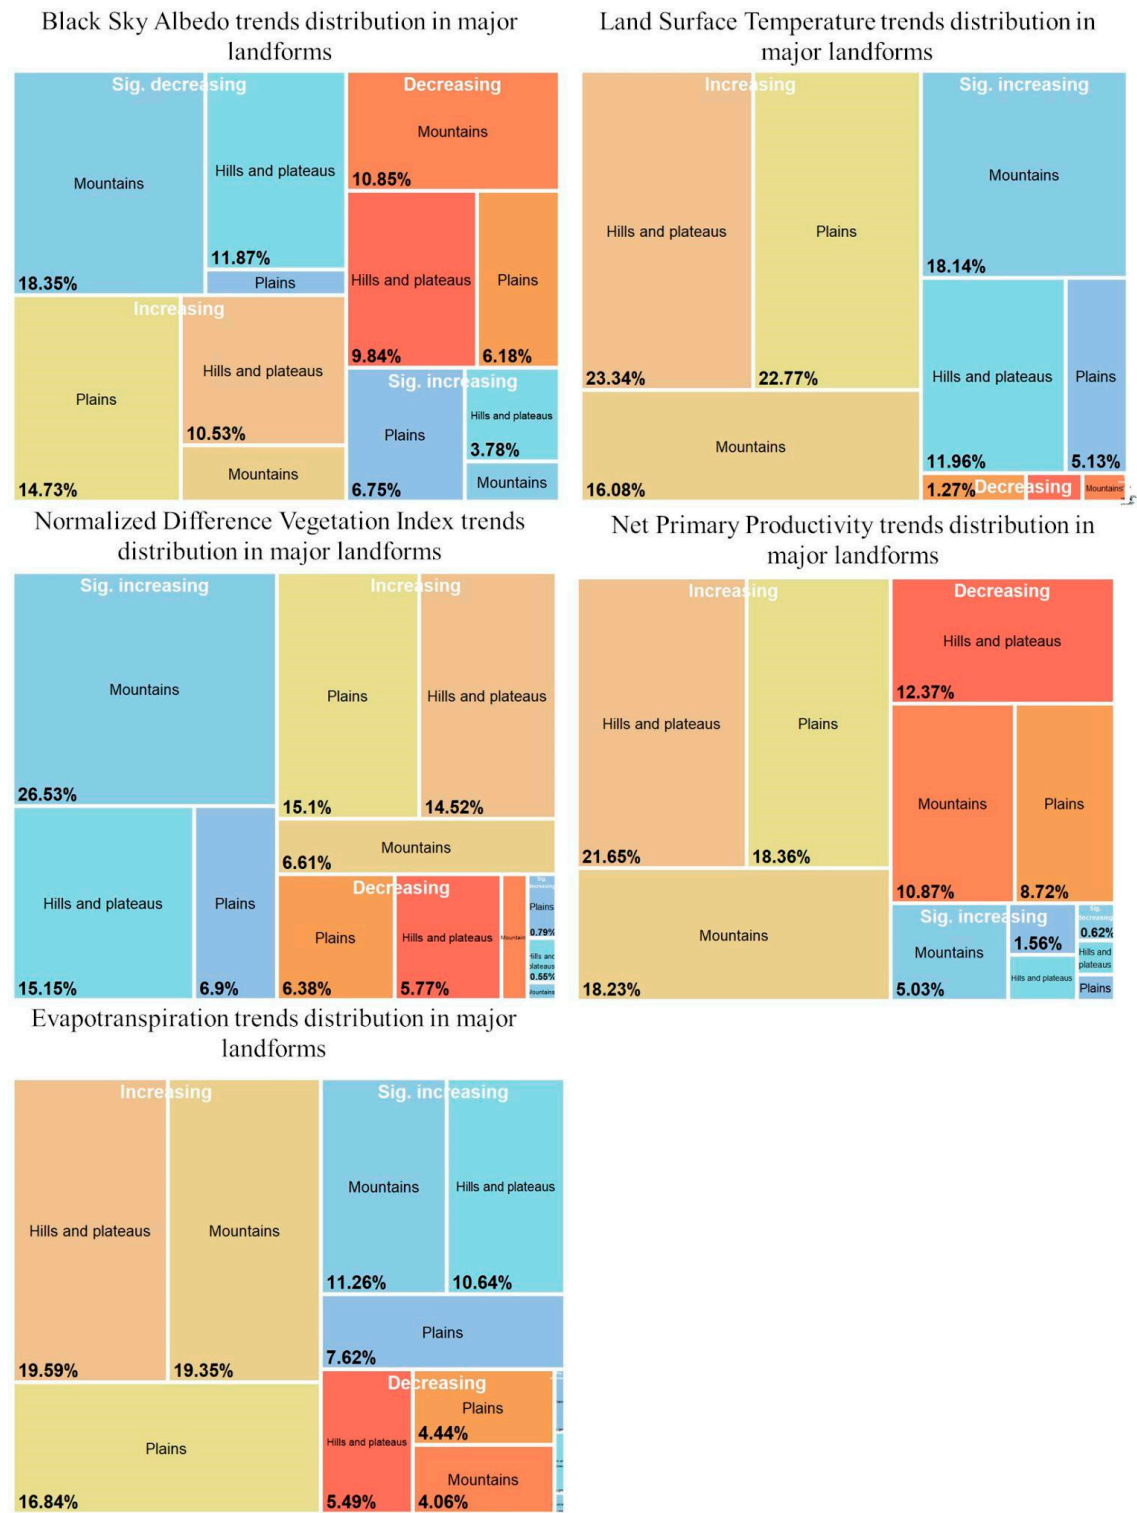

Figure S3: The percentage of the distribution of trend classes in major landforms compared to the total surface of Romania.

Black Sky Albedo trends distribution in main land cover

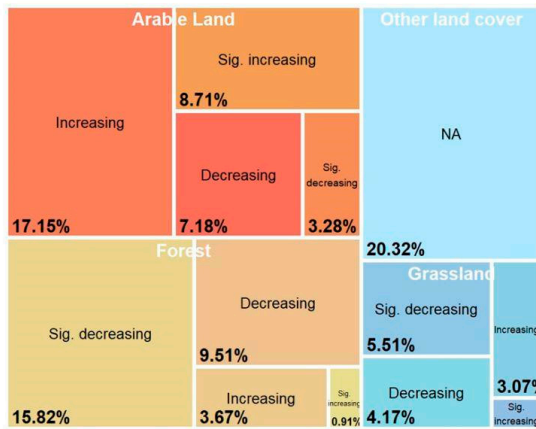

Land Surface Temperature trends distribution in main land cover

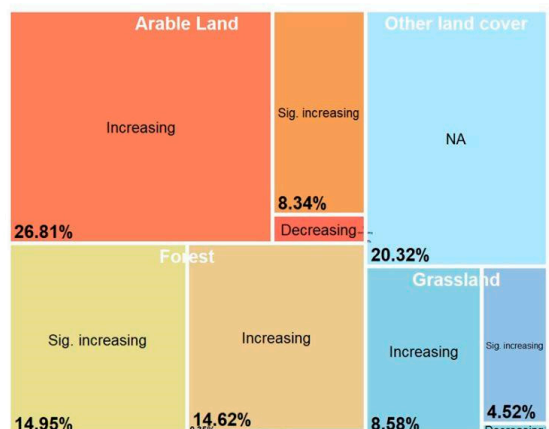

Normalized Difference Vegetation Index trends distribution in main land cover

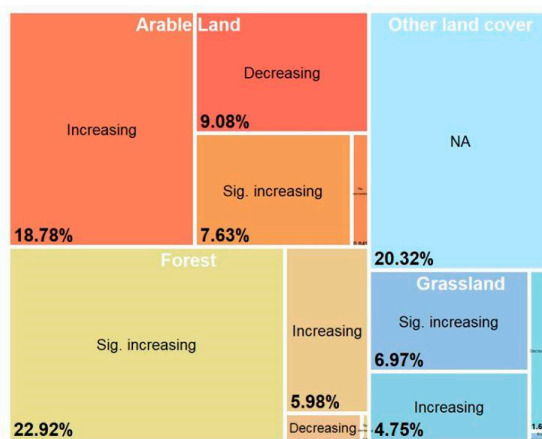

Net Primary Productivity trends distribution in main land cover

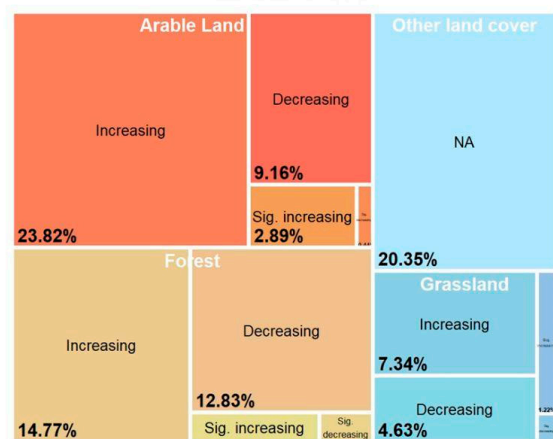

Evapotranspiration trends distribution in main land cover

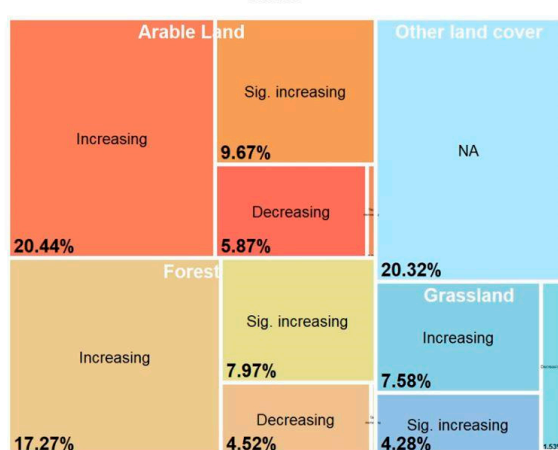

Figure S4: The percentage of the distribution of trend classes in main land cover compared to the total surface of Romania.

Table S1: Total surfaces (%) with land degradation (LD), stable lands (S), and total improvement surfaces (I) at the level of major landforms and main types of land use.

| Major landforms       | Arable land (%) |          |          | Forest (%) |          |          | Grassland (%) |          |          |
|-----------------------|-----------------|----------|----------|------------|----------|----------|---------------|----------|----------|
|                       | <i>LD</i>       | <i>S</i> | <i>I</i> | <i>LD</i>  | <i>S</i> | <i>I</i> | <i>LD</i>     | <i>S</i> | <i>I</i> |
| Eastern Carpathians   | 2.65            | 23.25    | 74.10    | 1.14       | 11.62    | 87.24    | 0.63          | 8.03     | 91.34    |
| Curvature Carpathians | 0               | 1.62     | 98.38    | 0.96       | 14.99    | 84.05    | 0.07          | 4.54     | 95.39    |
| Southern Carpathians  | 9.55            | 28.70    | 61.75    | 0.88       | 11.20    | 87.92    | 1.01          | 6.08     | 92.91    |
| Banat Carpathians     | 0.06            | 0.86     | 99.08    | 0.11       | 2.50     | 97.39    | 0.27          | 2.73     | 97.00    |
| Sub-Carpathian        | 21.91           | 34.91    | 43.17    | 0.63       | 7.14     | 92.24    | 3.32          | 11.71    | 84.97    |
| Western Carpathians   | 1.43            | 7.16     | 91.41    | 0.49       | 3.94     | 95.57    | 0.15          | 1.88     | 97.97    |
| Transylvanian         | 9.05            | 32.97    | 57.98    | 0.85       | 5.70     | 93.45    | 5.42          | 19.57    | 75.00    |
| Depression            |                 |          |          |            |          |          |               |          |          |
| Crisana Hills         | 5.88            | 23.56    | 70.56    | 1.29       | 10.83    | 87.89    | 4.57          | 19.62    | 75.81    |
| Banat Hills           | 22.39           | 16.07    | 61.54    | 1.17       | 3.79     | 95.04    | 3.83          | 8.58     | 87.58    |
| Mehedinti Plateau     | 1.63            | 2.44     | 95.93    | 0.00       | 0.54     | 99.46    | 0.00          | 3.38     | 96.62    |
| Getic Plateau         | 6.38            | 33.58    | 60.05    | 0.50       | 5.74     | 93.76    | 0.79          | 13.12    | 86.09    |
| Moldavian Plateau     | 18.37           | 63.21    | 18.42    | 3.37       | 28.81    | 67.82    | 12.67         | 60.98    | 26.35    |
| Western Plain         | 21.23           | 56.63    | 22.14    | 4.38       | 30.23    | 65.39    | 17.61         | 55.24    | 27.15    |
| Romanian Plain        | 14.79           | 63.13    | 22.09    | 4.34       | 33.70    | 61.96    | 5.58          | 47.73    | 46.69    |
| Dobrogea Plateau      | 15.95           | 68.39    | 15.66    | 1.65       | 39.59    | 58.76    | 14.52         | 56.91    | 28.58    |
| Danube Delta          | 35.41           | 47.62    | 16.97    | 10.42      | 32.39    | 57.18    | 11.11         | 60.34    | 28.54    |

Table S2: Total surfaces (km<sup>2</sup>) with land degradation (LD), stable lands (S), and total improvement surfaces (I) at the level of major landforms and main types of land use.

| Major landforms       | Arable land (km <sup>2</sup> ) |          |          | Forest (km <sup>2</sup> ) |          |          | Grassland (km <sup>2</sup> ) |          |          |
|-----------------------|--------------------------------|----------|----------|---------------------------|----------|----------|------------------------------|----------|----------|
|                       | <i>LD</i>                      | <i>S</i> | <i>I</i> | <i>LD</i>                 | <i>S</i> | <i>I</i> | <i>LD</i>                    | <i>S</i> | <i>I</i> |
| Eastern Carpathians   | 64.57                          | 566.76   | 1796.53  | 187.33                    | 1905.96  | 14332.94 | 29.09                        | 372.89   | 4222.14  |
| Curvature Carpathians | 0                              | 0.87     | 53.08    | 44.86                     | 701.88   | 3940.16  | 0.52                         | 34.82    | 732.23   |
| Southern Carpathians  | 52.03                          | 156.58   | 337.50   | 83.38                     | 1059.71  | 8321.13  | 21.28                        | 128.89   | 1975.32  |
| Banat Carpathians     | 0.17                           | 2.46     | 285.08   | 5.47                      | 123.19   | 4810.01  | 2.63                         | 26.25    | 934.01   |
| Sub-Carpathian        | 646.87                         | 1034.79  | 1301.15  | 36.27                     | 413.07   | 5409.04  | 83.30                        | 295.35   | 2 182.0  |
| Western Carpathians   | 2.06                           | 10.32    | 132.25   | 33.87                     | 274.19   | 6658.77  | 2.75                         | 34.97    | 1820.16  |
| Transylvanian         | 626.28                         | 2281.41  | 4012.57  | 49.68                     | 333.73   | 5454.71  | 353.62                       | 1277.54  | 4884.39  |
| Depression            |                                |          |          |                           |          |          |                              |          |          |
| Crisana Hills         | 163.10                         | 652.51   | 1959.24  | 30.10                     | 253.73   | 2063.55  | 59.99                        | 257.86   | 998.17   |
| Banat Hills           | 262.97                         | 187.66   | 715.59   | 19.44                     | 62.88    | 1576.18  | 32.86                        | 73.47    | 746.97   |
| Mehedinti Plateau     | 0.35                           | 0.53     | 20.97    | 0                         | 2.30     | 422.0    | 0                            | 7.43     | 212.53   |
| Getic Plateau         | 295.58                         | 1559.17  | 2781.68  | 22.21                     | 257.93   | 4194.07  | 9.60                         | 159.87   | 1044.58  |
| Moldavian Plateau     | 2080.56                        | 7181.15  | 2093.96  | 115.30                    | 989.71   | 2321.32  | 395.19                       | 1907.11  | 825.67   |
| Western Plain         | 2458.86                        | 6536.96  | 2554.39  | 29.21                     | 201.37   | 435.25   | 331.58                       | 1040.93  | 512.40   |



|                  |         |          |         |        |        |         |        |         |         |
|------------------|---------|----------|---------|--------|--------|---------|--------|---------|---------|
| Romanian Plain   | 5092.80 | 21735.55 | 7610.66 | 127.84 | 991.92 | 1824.41 | 153.93 | 1320.86 | 1295.98 |
| Dobrogea Plateau | 1072.53 | 4592.22  | 1049.41 | 16.55  | 395.86 | 587.56  | 147.65 | 578.14  | 290.15  |
| Danube Delta     | 217.27  | 292.45   | 104.26  | 19.55  | 60.85  | 107.40  | 20.53  | 111.30  | 52.64   |

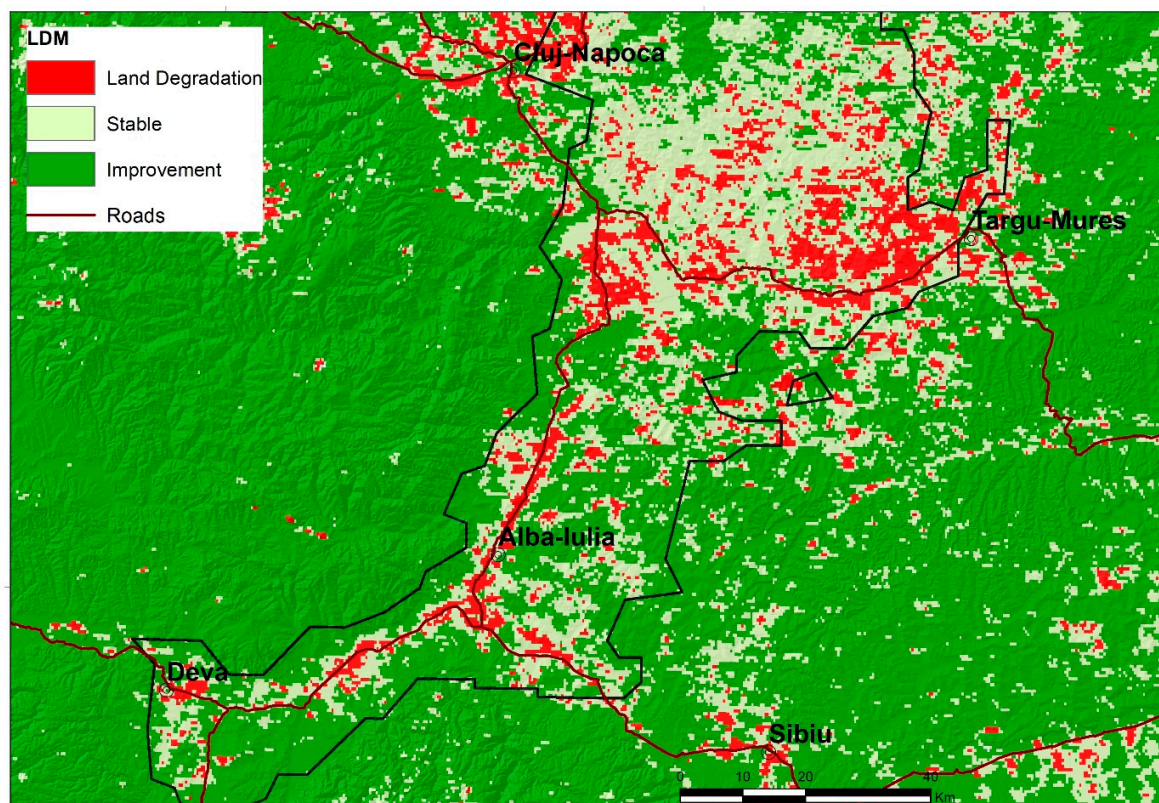

Figure S5: Spatial distribution of land degradation in the Deva, Alba-Iulia, Cluj-Napoca, and Targu-Mures areas.
